# Supplementary material for: Function of PHEX mutations p.Glu145* and p.Trp749Arg in families with X-linked hypophosphatemic rickets by the negative regulation mechanism on FGF23 promoter transcription
Source: PubMed Central journal article supplement (PMC9163062; doi:10.1038/s41419-022-04969-5), 2022-06-02

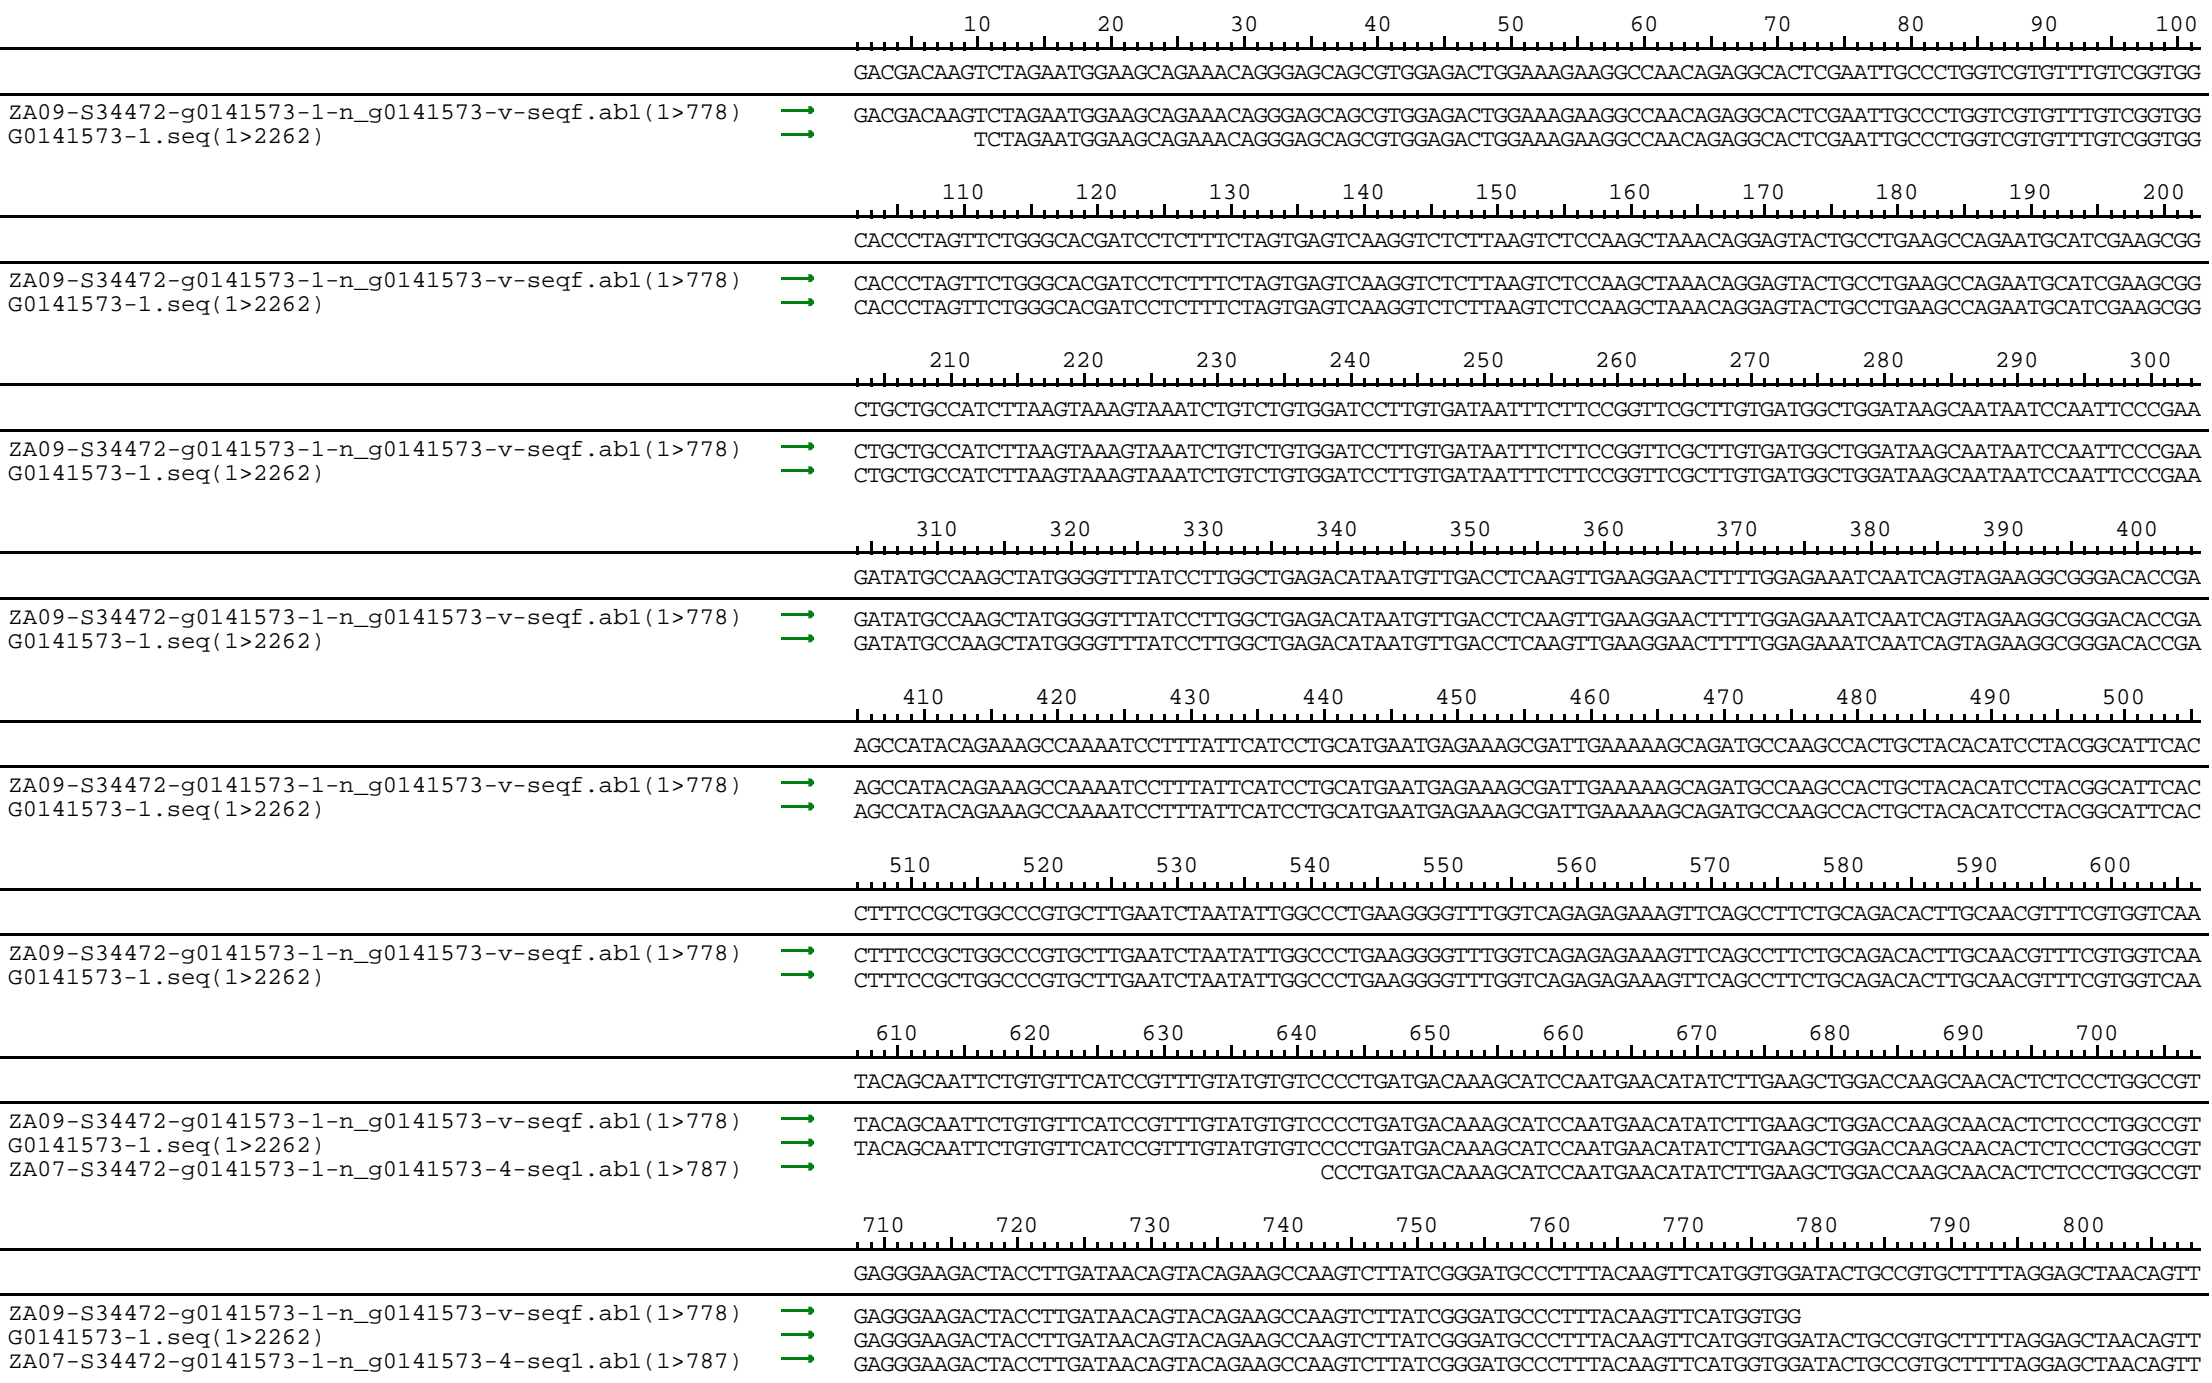

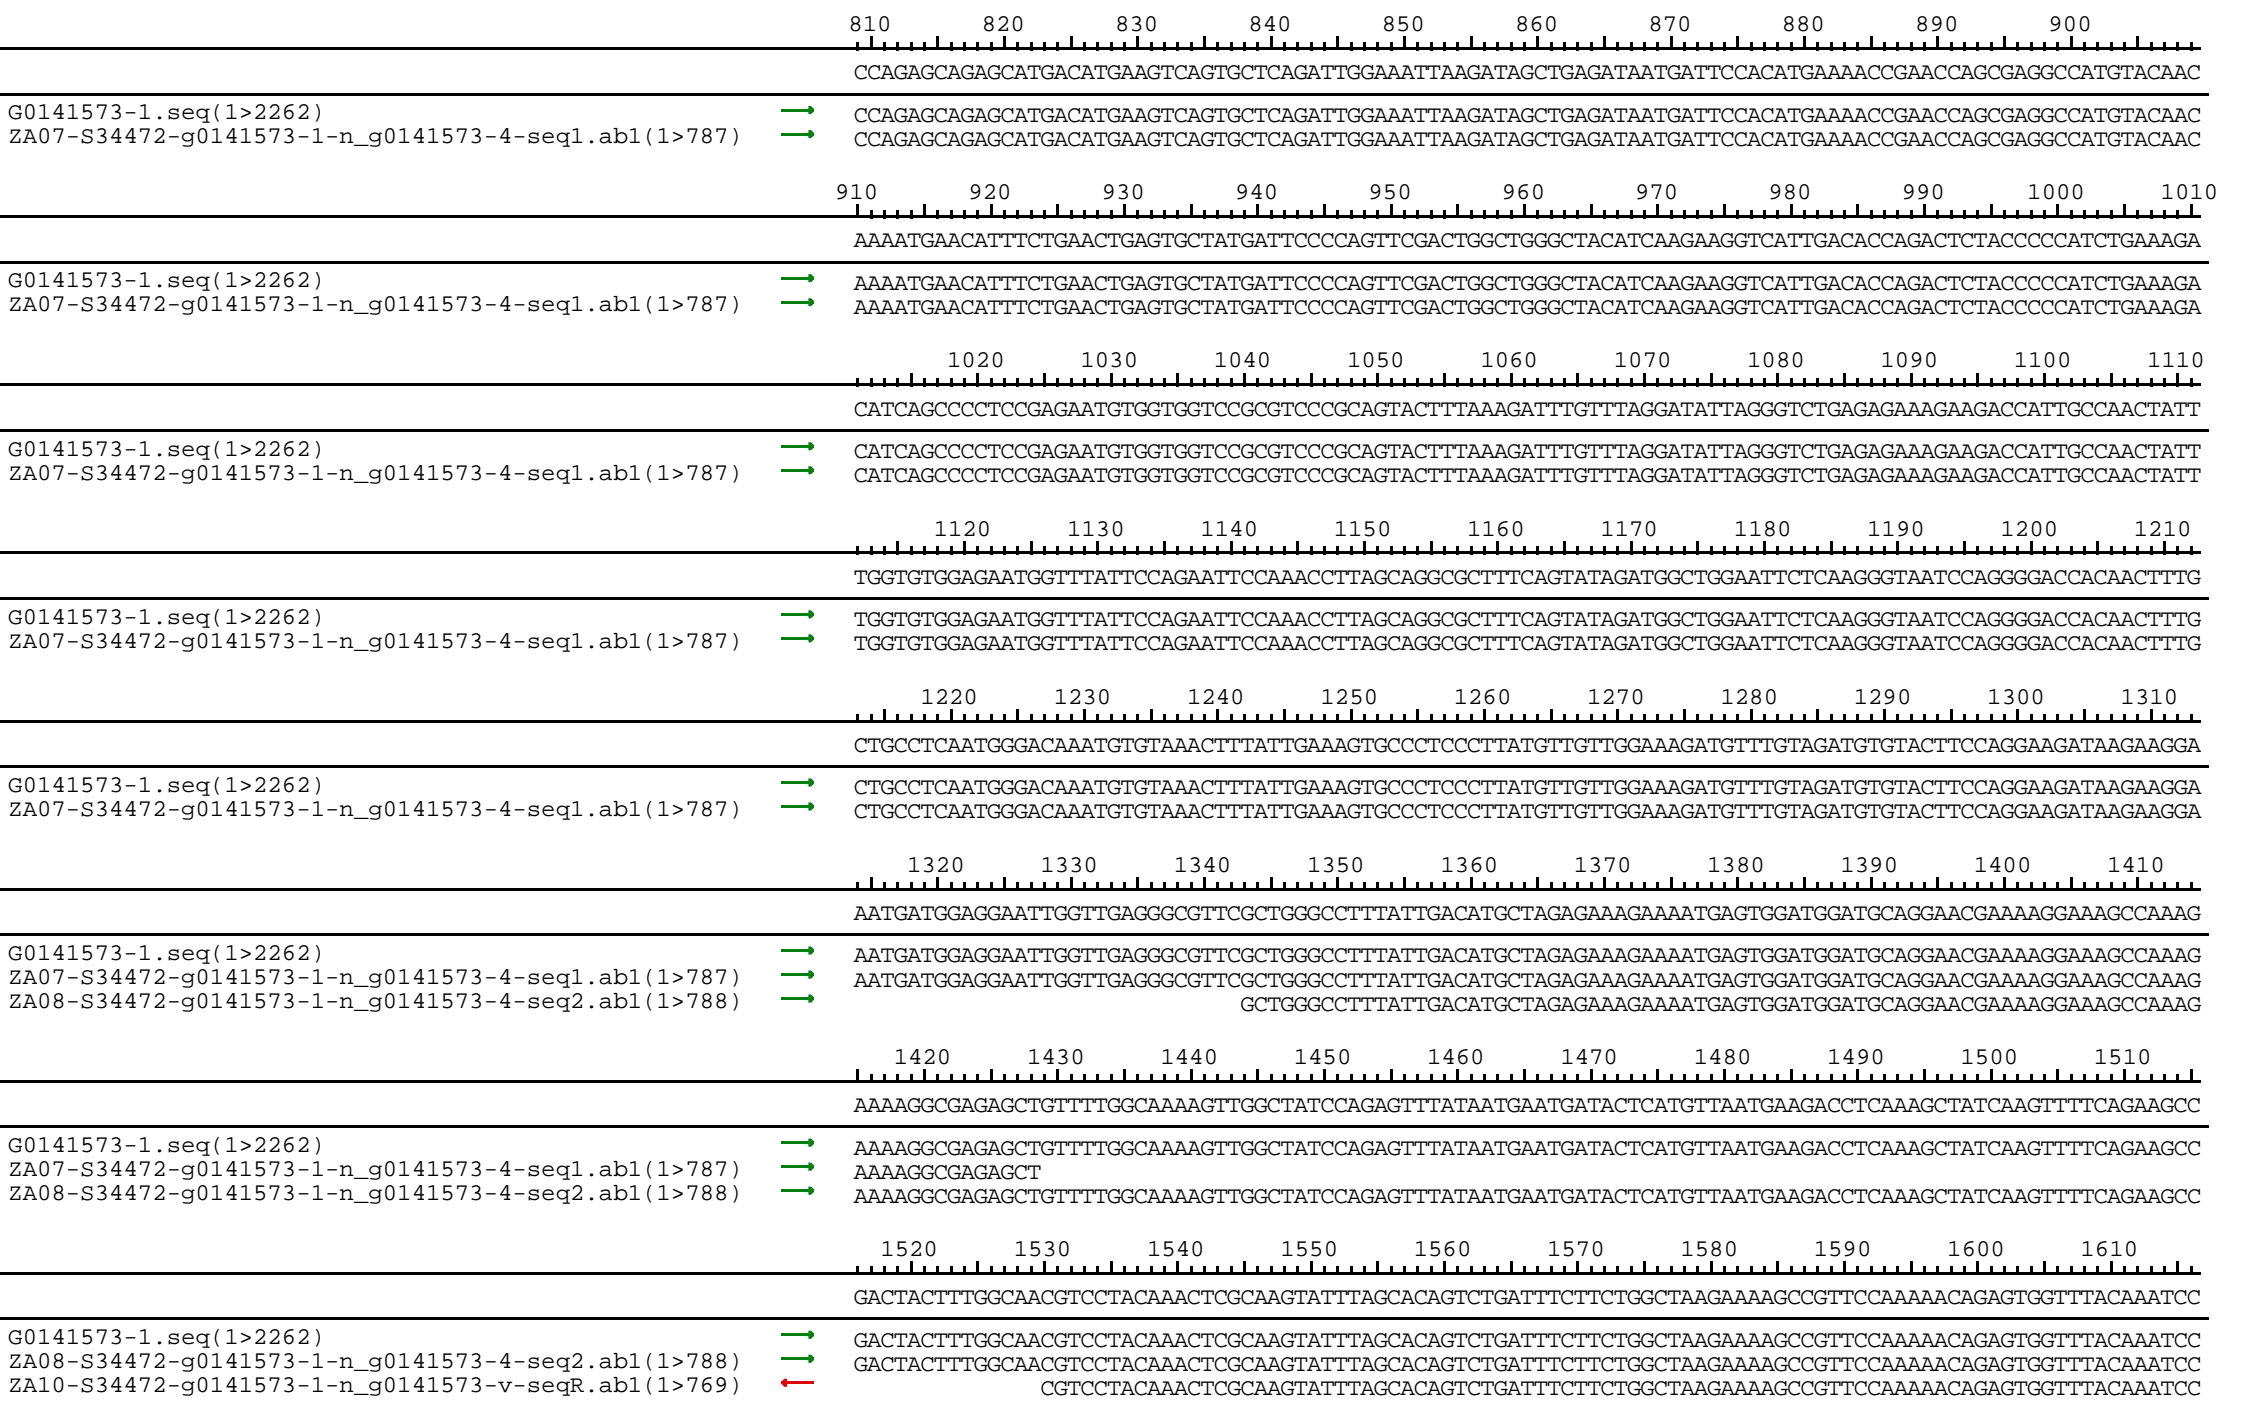

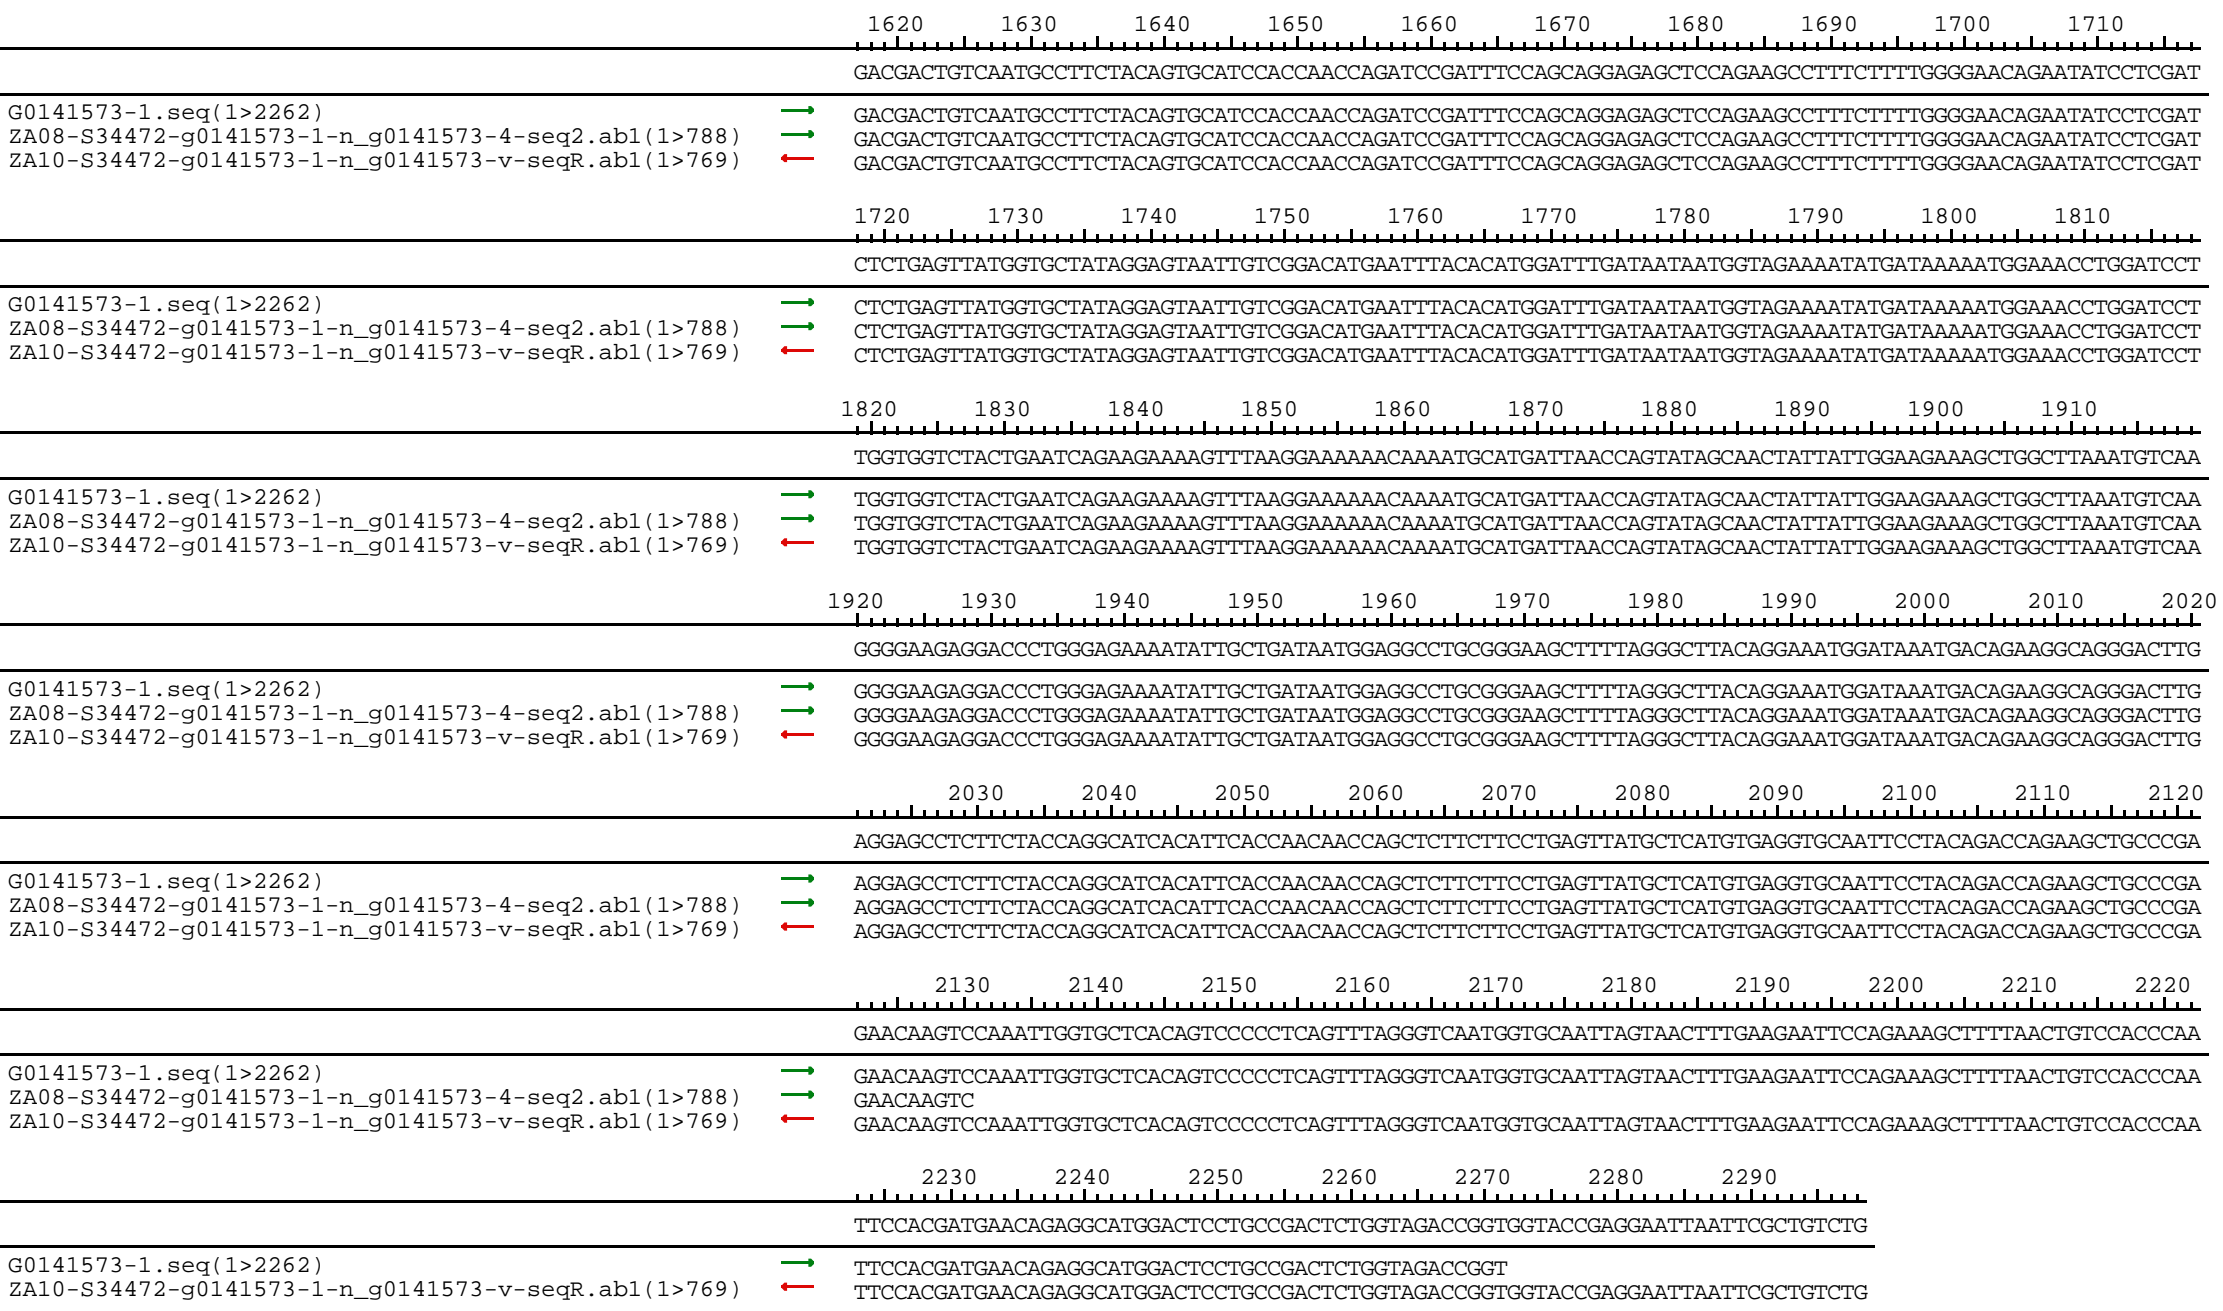

Supplement: 41419_2022_4969_MOESM3_ESM.pdf [file 41419_2022_4969_MOESM3_ESM.pdf]
