# Supplementary material for: Function of PHEX mutations p.Glu145* and p.Trp749Arg in families with X-linked hypophosphatemic rickets by the negative regulation mechanism on FGF23 promoter transcription
Source: PubMed Central journal article supplement (PMC9163062; doi:10.1038/s41419-022-04969-5), 2022-06-02
Supplement: 41419_2022_4969_MOESM5_ESM.pdf [file 41419_2022_4969_MOESM5_ESM.pdf]

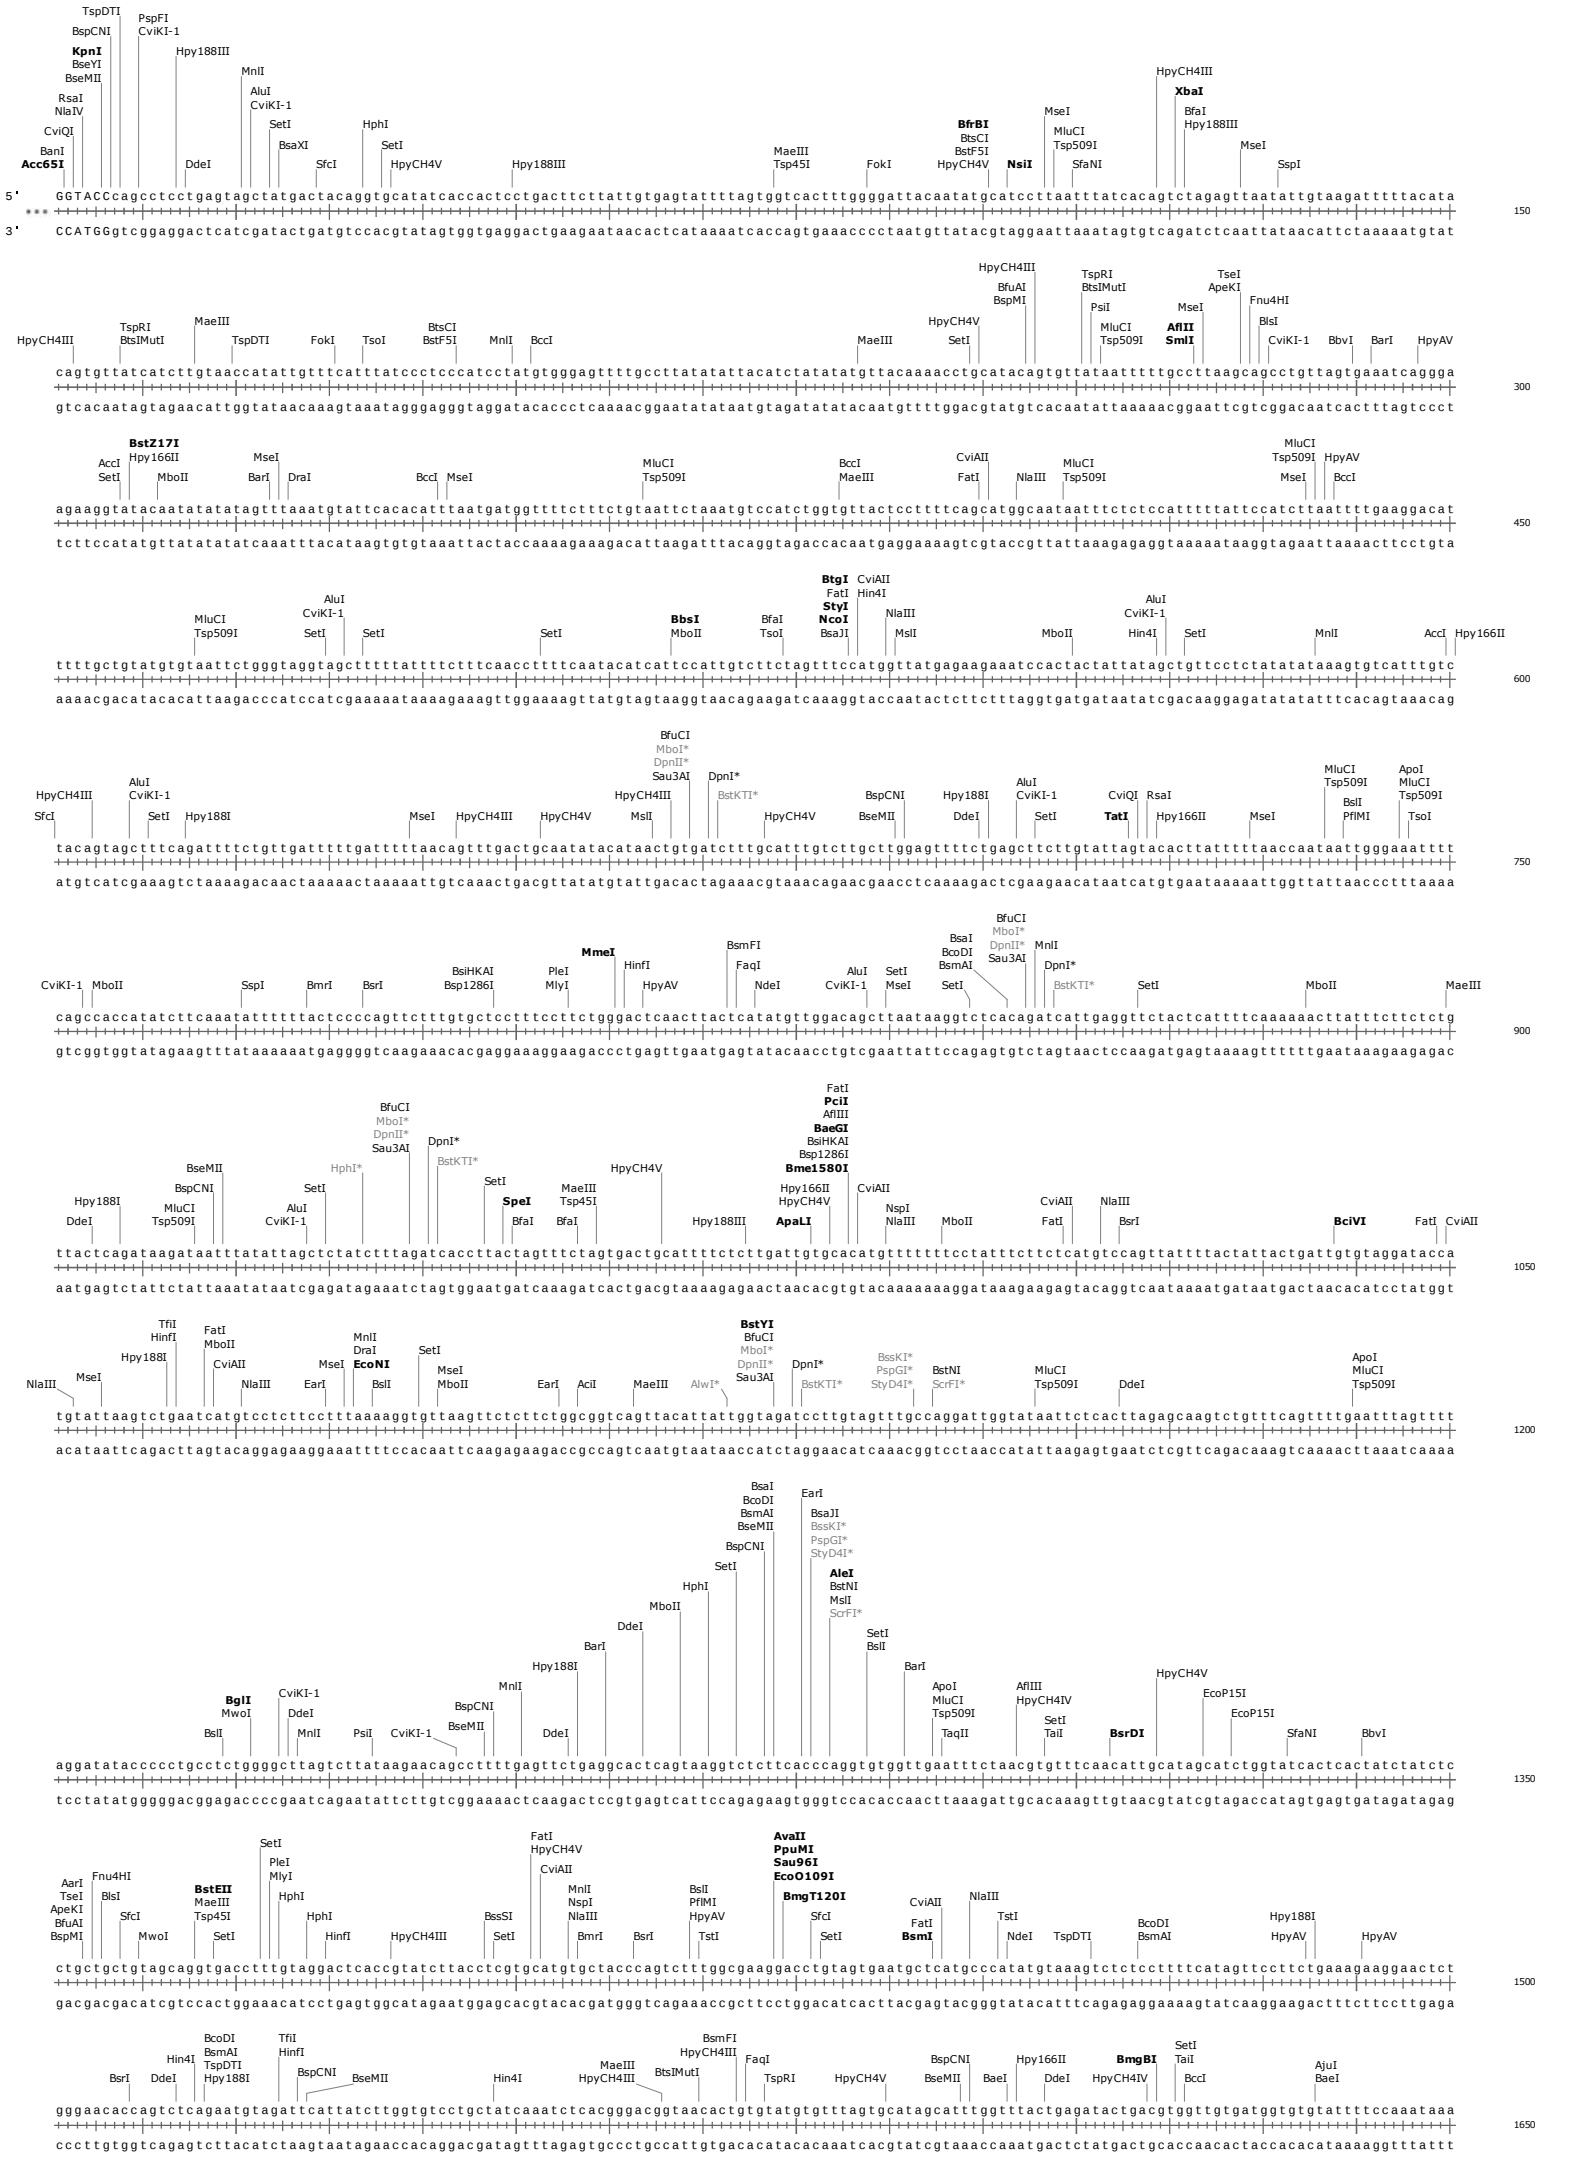

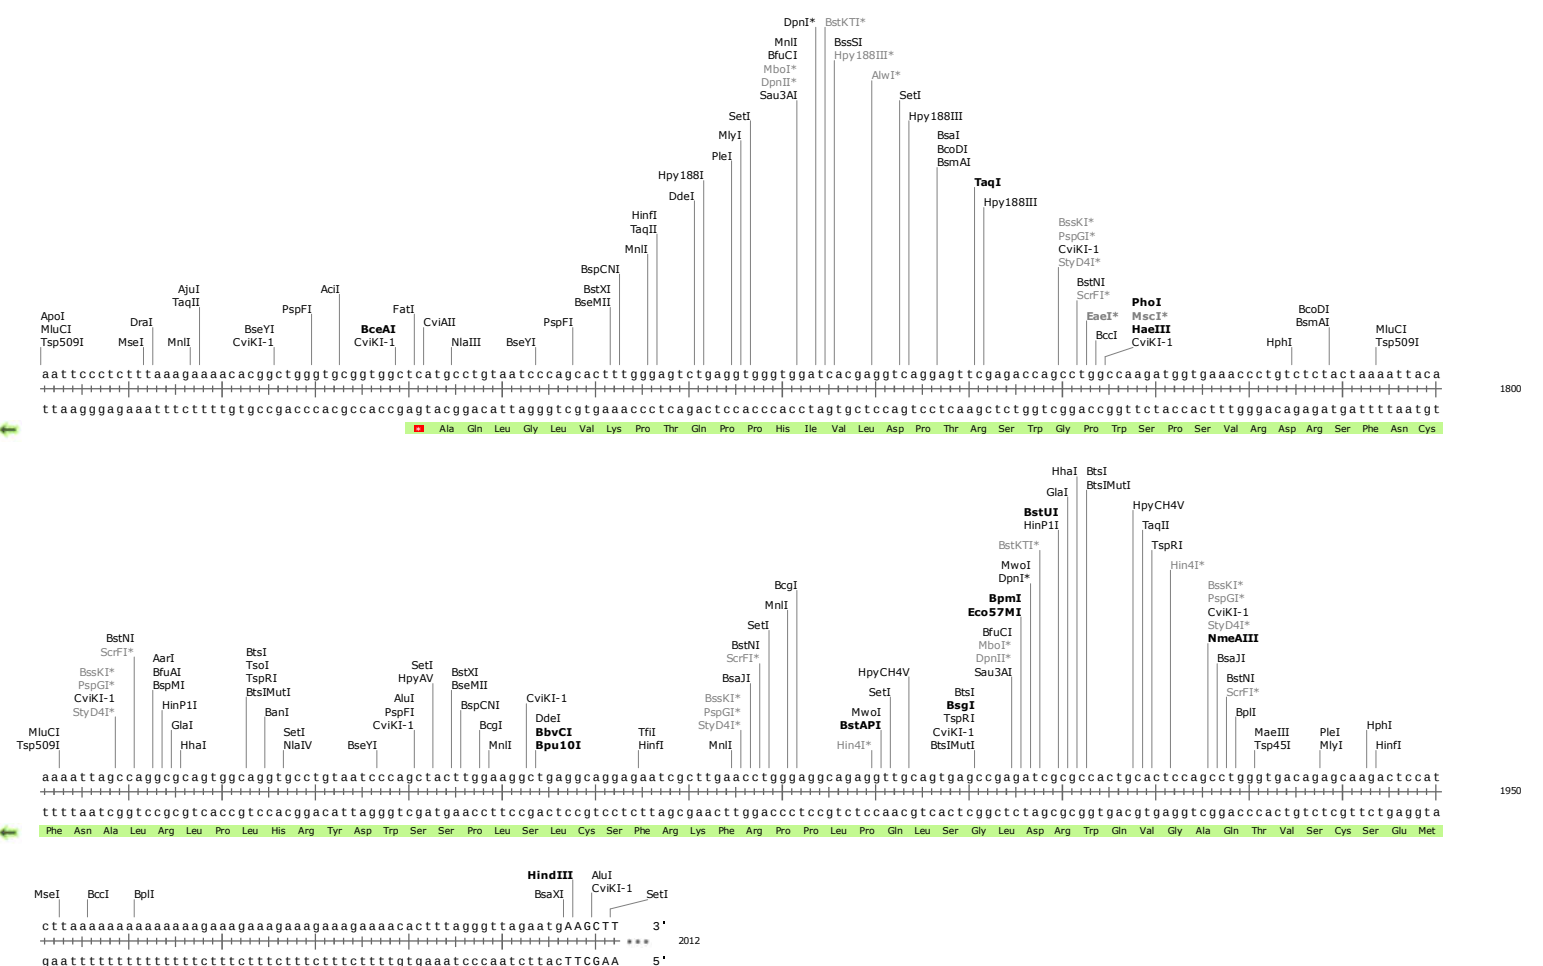

**B**

| QC Items         |                      |                                                                            |         |
|------------------|----------------------|----------------------------------------------------------------------------|---------|
| QC Items         | Method               | Specifications                                                             | Results |
| Target Sequence  | Sequence alignment   | Sequencing results are consistent to the confirmed sequence.               | Pass    |
| Vector Sequence  | Sequence alignment   | 20bp flanking sequences of the vector are correct.                         | NA      |
| Reading Frame    | Sequence alignment   | Frame is correct and consistent to the client's requirement.               | Pass    |
| Fragment Size    | Restriction Digests  | The size of inserted fragment is right and free of any contaminated bands. | Pass    |
| Quality/Quantity | UV spectrophotometry | Miniprep: OD260/280=1.7~2.0<br>4µg/tube, 1 tube, Lyophilized               | Pass    |
| Appearance       | Visual inspection    | Clear and free of foreign particles.                                       | Pass    |
| Customized Test  | NA                   | NA                                                                         | NA      |

  

| Restriction Digestion Map                                                                                                                                                 |                    |                                          |                     |
|---------------------------------------------------------------------------------------------------------------------------------------------------------------------------|--------------------|------------------------------------------|---------------------|
|                                                                                                                                                                           | M                  | 1                                        | 2                   |
| <p>1% agarose</p> <p>bp ng/5µl</p> <p>5000 75</p> <p>3000 75</p> <p>2000 75</p> <p>1500 75</p> <p>1000 150</p> <p>750 75</p> <p>500 100</p> <p>250 100</p> <p>100 100</p> | Lane M: DNA Marker | Lane 1: Plasmid digested by KpnI HindIII | Lane 2: Plasmid DNA |
| Date: 2021/7/25                                                                                                                                                           |                    |                                          |                     |

**Description:**
